# Supplementary material
Source: MDPI journal article supplement (https://www.mdpi.com/2311-5637/7/3/129)
Supplement: s1 [file s1]

Supplementary Table S1. Comparison of different purification methods for cys-4MMP production.

| Starting Material        | End Product         | Purification                                                                                                         | Purity      | Yield    | Toxic Chemical Used | Ref               |
|--------------------------|---------------------|----------------------------------------------------------------------------------------------------------------------|-------------|----------|---------------------|-------------------|
| Cys·HCl·H <sub>2</sub> O | Cys-4MMP            | Silica column C <sub>18</sub>                                                                                        | NA          | NA       | None                | [8]               |
| Cysteine                 | Cys-4MMP            | <ul style="list-style-type: none"><li>• Extraction</li><li>• Filtration and crystallization</li></ul>                | Approx. 33% | 22%      | None                | [21]              |
| Cysteine                 | deuterated Cys-4MMP | Extraction                                                                                                           | Approx. 41% | NA       | Yes                 | [22]              |
| Cys·HCl·H <sub>2</sub> O | Cys-4MMP            | <ul style="list-style-type: none"><li>• Extraction</li><li>• Silica gel column</li><li>• Recrystallization</li></ul> | NMR grade   | 29.7–35% | None                | <b>This study</b> |

NA, not applicable.

A

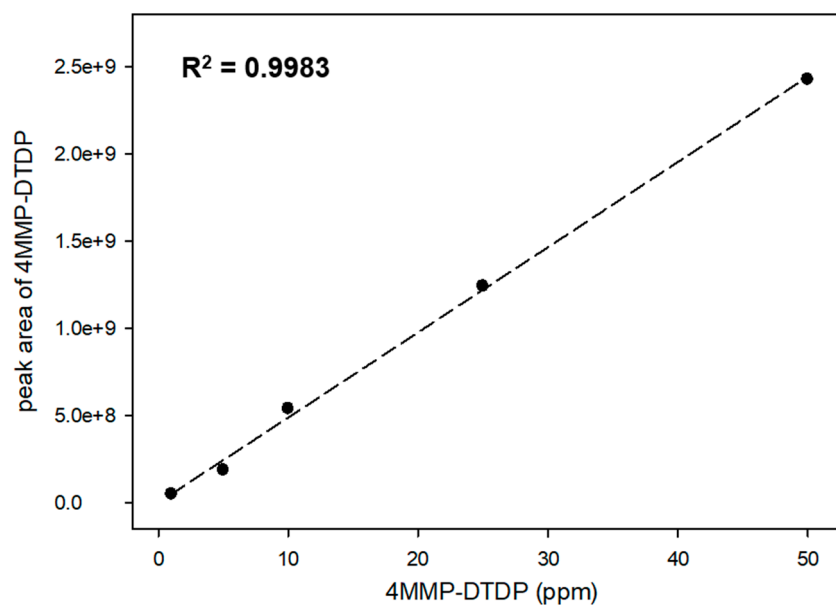

B

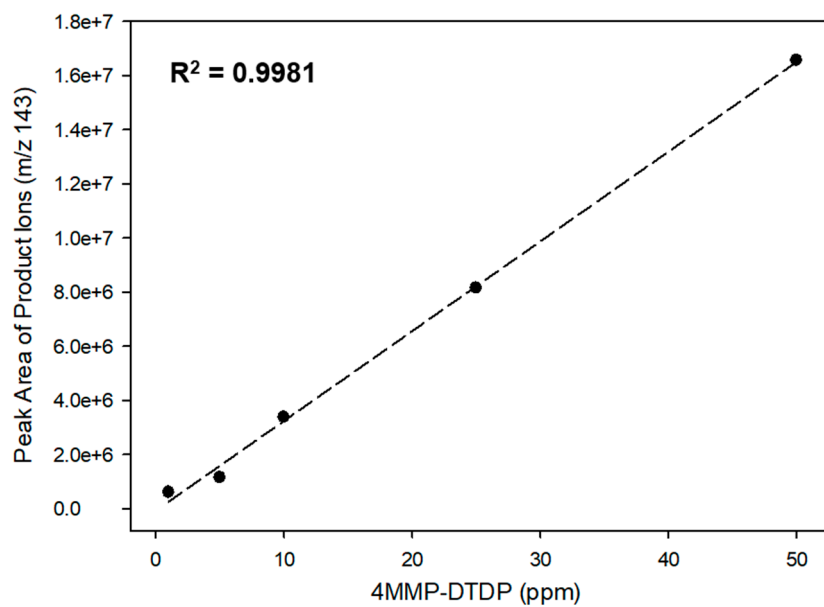

Supplementary Figure S1. Standard calibration curves of 4MMP-DTDP in the concentration range of 1 ppm to 50 ppm were based on the extracted ion chromatogram of (A) precursor ion signal of 4MMP-DTDP at m/z 242.0, and (B) product ion signal of 4MMP-DTDP at m/z 144.0.
